# Supplementary material for: Impact of Fixed Oil on Ostwald Ripening of Anti-Oral Cancer Nanoemulsions Loaded with Amomum kravanh Essential Oil
Source: MDPI journal article supplement (doi:10.3390/pharmaceutics14050938), 2022-04-26
Supplement: s1 [file s1]

# Supplementary Materials: Impact of Fixed Oil on Ostwald Ripening of Anti-Oral Cancer Nanoemulsions Loaded with Amomum Kravanh Essential Oil

Yotsanan Weerapol, Suwisit Manmuan, Nattaya Chaothanaphat, Siriporn Okonogi, Chutima Limmatvampirat, Son-taya Limmatvampirat and Sukannika Tubtimsri

Supplementary Data S1

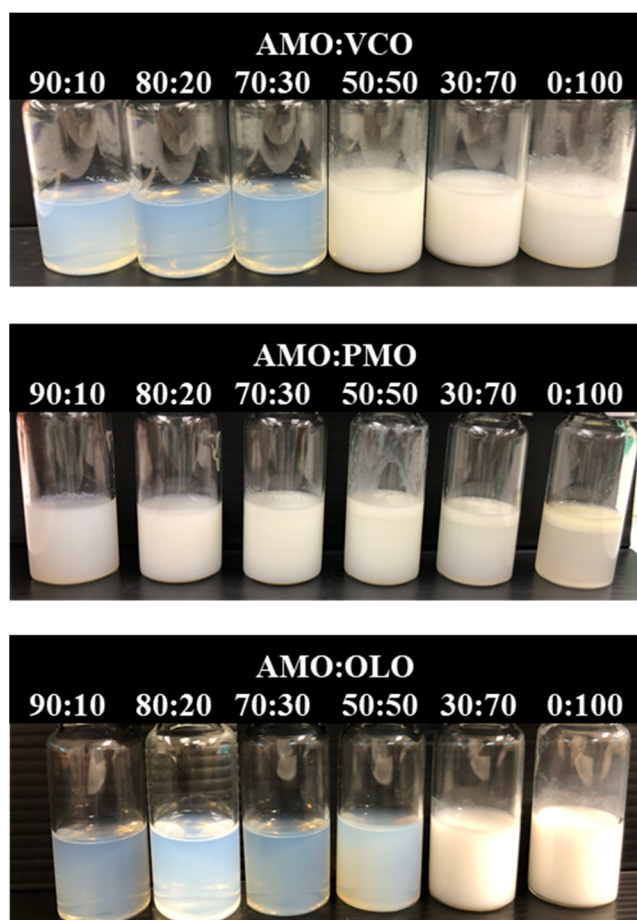

Physical characteristics of nanoemulsions when prepared from different types and amounts of fixed oils.

**Supplementary Data S2**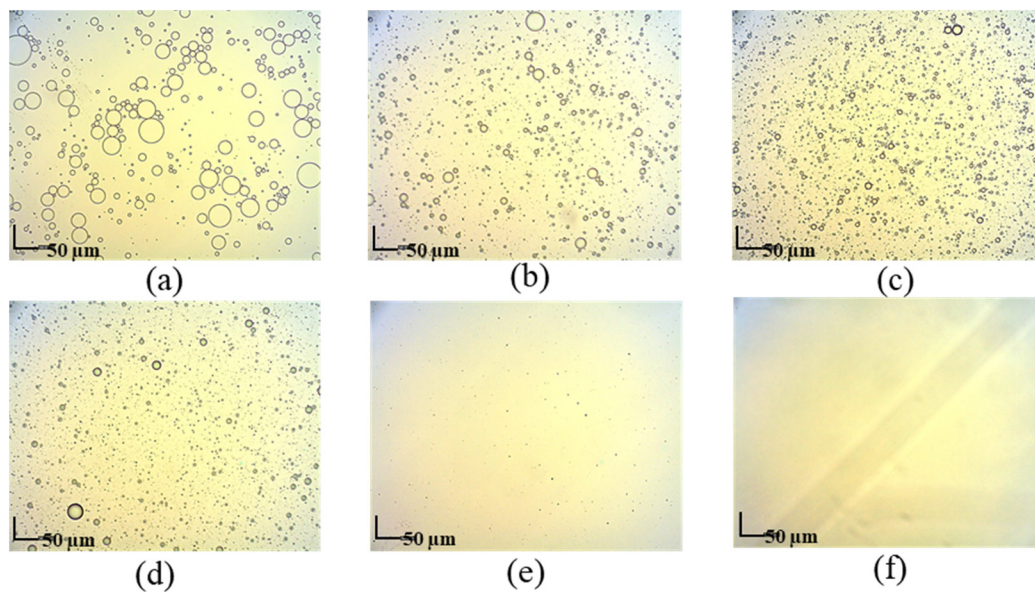

Microscopic pictures of AMO:PMO 0:100 (a), 30:70 (b), 50:50 (c), 70:30 (d), 80:20 (e), 90:10 ( f).

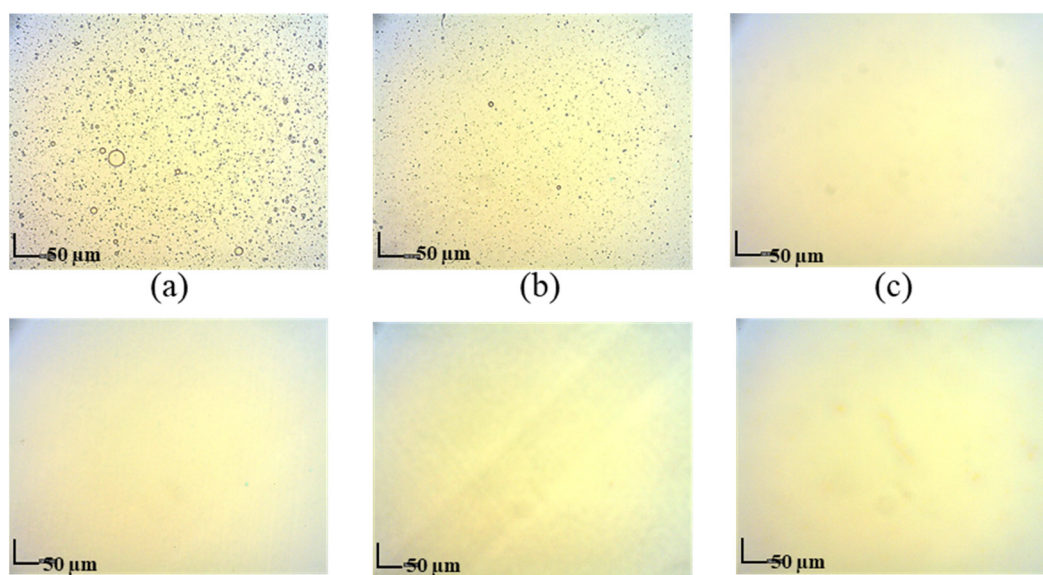

Microscopic pictures of AMO:OLO 0:100 (a), 30:70 (b), 50:50 (c), 70:30 (d), 80:20 (e), 90:10 ( f).

## Supplementary Data S3

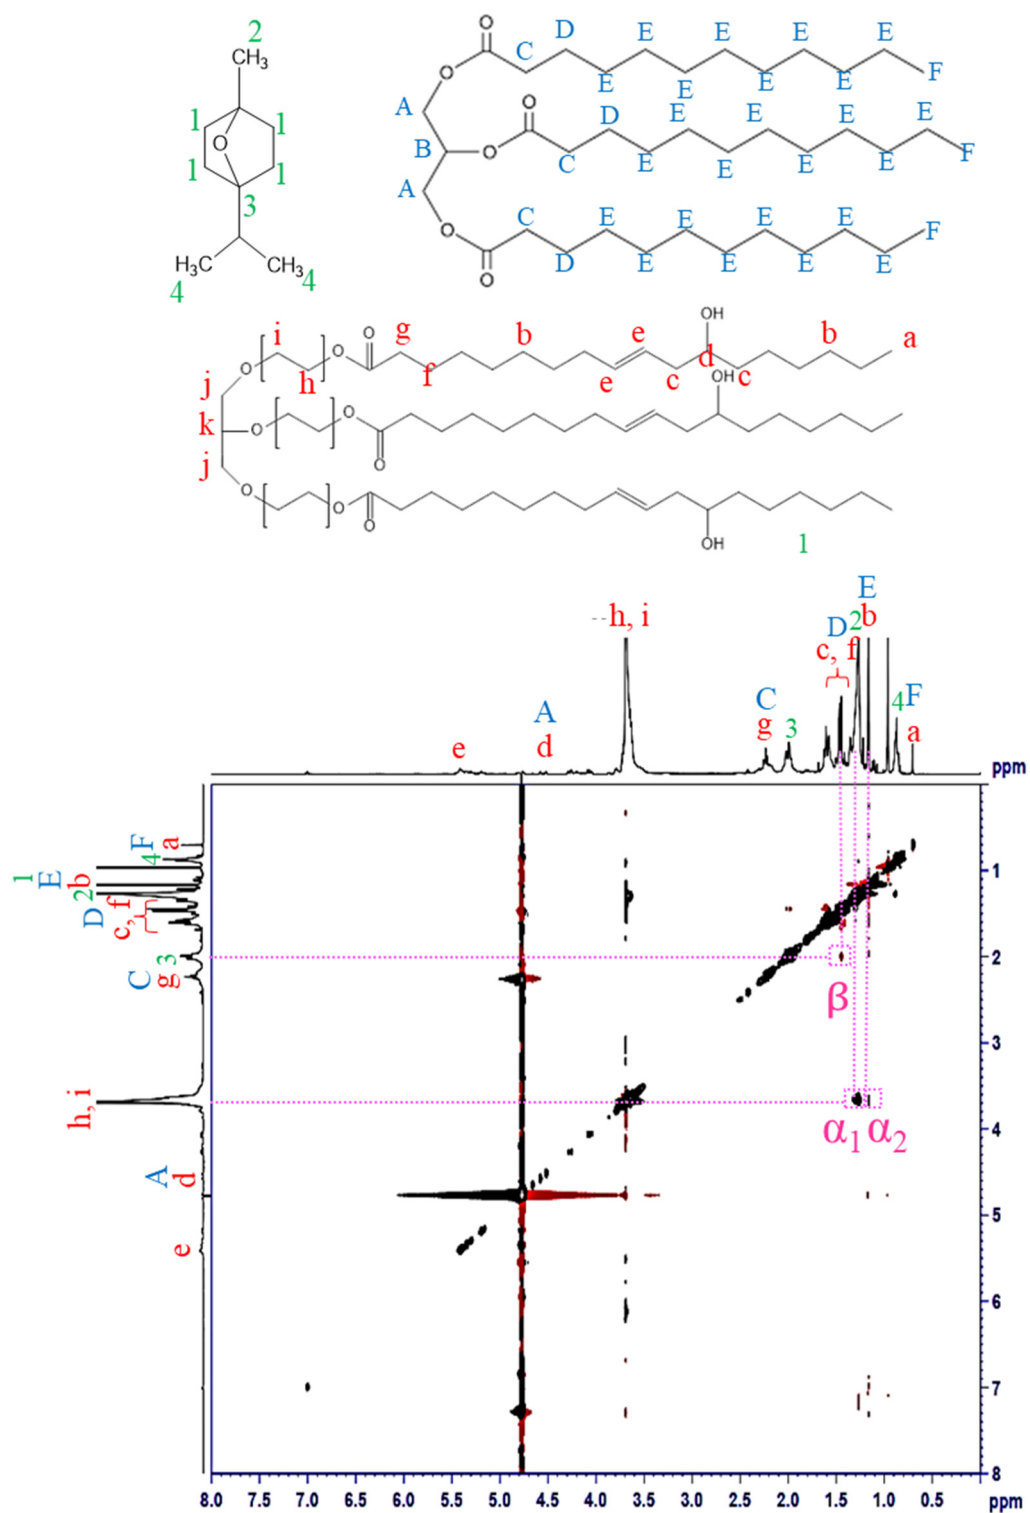 $^1\text{H}$ - $^1\text{H}$  NOESY spectra of AMO:VCO 80:20

## Supplementary Data S4

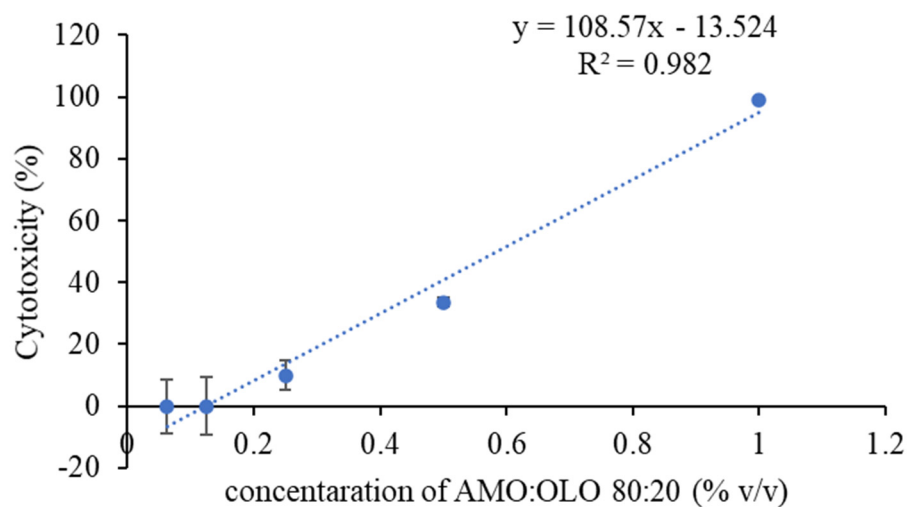

Dose response curve of KON cells after treatment with AMO:OLO 80:20 nanoemulsion

## Supplementary Data S5

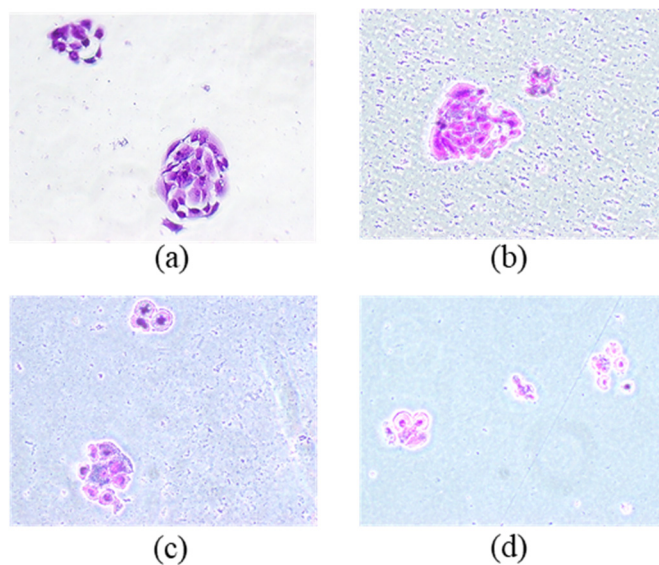

Colony morphology after treatment with control (a), AMO solution (at concentrations equal to those used in nanoemulsions) (b), IC<sub>60</sub> of AMO:OLO 80:20 nanoemulsion (c) and 30 µg/ml of 5-FU (d) for 15 min.
